# Supplementary material for: Dexamethasone and lenalidomide have distinct functional effects on erythropoiesis
Source: PubMed Central journal article supplement — Blood. 2011 Apr 28;118(8):2296–304. doi: 10.1182/blood-2010-11-318543 (PMC3162357; doi:10.1182/blood-2010-11-318543), 2011-08-25
Supplement: supp_blood-2010-11-318543_Document1.pdf [file supp_blood-2010-11-318543_Document1.pdf]

**Table S1. Lentiviral vectors**

| shRNA           | Target Sequence       |
|-----------------|-----------------------|
| <i>RPS14</i> #1 | CCTTGCCCGCTCGGGTATGAA |
| <i>RPS14</i> #2 | GCTATGTTGGCTGCCCAGGAT |
| <i>RPS19</i> #1 | CGGCGTCATGCCCAGCCACTT |
| <i>RPS19</i> #2 | CTACGATGAGAACTGGTTCTA |

**Table S2. Primer sequences for qPCR**

| shRNA                        | Primer Sequence            |
|------------------------------|----------------------------|
| <i>RPS14</i> (human) Forward | 5'CTCAGGTGGCTGAAGGAGAG 3'  |
| <i>RPS14</i> (human) Reverse | 5'GCAGCCAACATAGCAGCATA 3'  |
| <i>RPS19</i> (human) Forward | 5'AGACGTGAACCAGCAGGAGT 3'  |
| <i>RPS19</i> (human) Reverse | 5'TTCTCTGACGTCCCCCATAG 3'  |
| Actin Human Forward          | 5' AGAGCTACGAGCTGCCTGAC 3' |
| Actin (human) Reverse        | 5' AGCACTGTGTTGGCGTACAG 3' |

**Table S3. Erythroid signature induced by the combination of dexamethasone and lenalidomide**

| Gene Set Enrichment Analysis  |      |      |           |           |
|-------------------------------|------|------|-----------|-----------|
| Dex+Len vs. Untreated samples |      |      |           |           |
| Gene Set                      | Size | NES  | NOM p-val | FDR q-val |
| Erythroid_1                   | 98   | 1.5  | 0.015     | 0.137     |
| Erythroid_2                   | 191  | 1.47 | 0.006     | 0.107     |

Both gene sets were published by Ebert et al.<sup>9</sup>

**Table S4. % knockdown by lentiviral vectors over time**

| shRNA          | Day 3 knockdown | Day 5 knockdown | Day 7 knockdown |
|----------------|-----------------|-----------------|-----------------|
| <b>RPS19#1</b> | 93.7%           | 88.8%           | 89.4%           |
| <b>RPS14#1</b> | 92.8%           | 43.9%           | 98.2%           |
| <b>RPS19#2</b> | 75.5%           | 80.6%           | 86.5%           |
| <b>RPS14#2</b> | 84.5%           | 87.3%           | 97.3%           |

**Table S5. Top marker genes upregulated by dexamethasone (Dex), lenalidomide (Len), and the combination of the two drugs (Dex+Len)**

| Name                 | Description                                                                  | S2NR    | Upregulated |
|----------------------|------------------------------------------------------------------------------|---------|-------------|
| FLJ22662             | FLJ22662:                                                                    | 3.3242  | Dex         |
| MGAM /// LOC642103   | na                                                                           | 4.3242  | Dex         |
| CSPG2                | CSPG2:chondroitin sulfate proteoglycan 2 (versican)                          | .3242   | Dex         |
| PNMT                 | PNMT:phenylethanolamine N-methyltransferase                                  | 6.3242  | Dex         |
| MS4A4A               | MS4A4A:membrane-spanning 4-domains, subfamily A, member 4                    | 7.3242  | Dex         |
| IL2RA                | IL2RA:interleukin 2 receptor, alpha                                          | 8.3242  | Dex         |
| ENPP4                | ENPP4:ectonucleotide pyrophosphatase/phosphodiesterase 4 (putative function) | 9.3242  | Dex         |
| CRISPLD2             | CRISPLD2:cysteine-rich secretory protein LCCL domain containing 2            | .3242   | Dex         |
| C1QB                 | C1QB:complement component 1, q subcomponent, B chain                         | 11.3242 | Dex         |
| IL18R1               | IL18R1:interleukin 18 receptor 1                                             | 12.3242 | Dex         |
| MGC17330             | MGC17330:                                                                    | 13.3242 | Dex         |
| GSTM5                | GSTM5:glutathione S-transferase M5                                           | 14.3242 | Dex         |
| SOCS1                | SOCS1:suppressor of cytokine signaling 1                                     | .3242   | Dex         |
| ISG20                | ISG20:interferon stimulated exonuclease gene 20kDa                           | 16.3242 | Dex         |
| ALF                  | ALF:                                                                         | 17.3242 | Dex         |
| THBS1                | THBS1:thrombospondin 1                                                       | 18.3242 | Dex         |
| TBC1D8               | TBC1D8:TBC1 domain family, member 8 (with GRAM domain)                       | 19.3242 | Dex         |
| NFIL3                | NFIL3:nuclear factor, interleukin 3 regulated                                | .3242   | Dex         |
| MOSC1                | MOSC1:MOCO sulphurase C-terminal domain containing 1                         | 21.3242 | Dex         |
| STON1                | STON1:stonin 1                                                               | 22.3242 | Dex         |
| CEBPD                | CEBPD:CCAAT/enhancer binding protein (C/EBP), delta                          | 23.3242 | Dex         |
| MFGE8                | MFGE8:milk fat globule-EGF factor 8 protein                                  | 24.3242 | Dex         |
| ALOX5                | ALOX5:arachidonate 5-lipoxygenase                                            | .3242   | Dex         |
| ATM /// LOC651610    | na                                                                           | 26.3242 | Dex         |
| SMA4 /// LOC643367 / | na                                                                           | 27.3242 | Dex         |
| GOLGA8B              | GOLGA8B:golgi autoantigen, golgin subfamily a, 8B                            | 28.3242 | Dex         |
| C14ORF106            | C14ORF106:chromosome 14 open reading frame 106                               | 29.3242 | Dex         |
| EEA1                 | EEA1:early endosome antigen 1, 162kD                                         | .3242   | Dex         |
| LYST                 | LYST:lysosomal trafficking regulator                                         | 31.3242 | Len         |
| CD38                 | CD38:CD38 molecule                                                           | 32.3242 | Len         |
| DUSP1                | DUSP1:dual specificity phosphatase 1                                         | 33.3242 | Len         |
| PER1                 | PER1:period homolog 1 (Drosophila)                                           | 34.3242 | Len         |
| TSC22D3              | TSC22D3:TSC22 domain family, member 3                                        | .3242   | Len         |
| KLF9                 | KLF9:Kruppel-like factor 9                                                   | 36.3242 | Len         |
| AREG /// LOC653193   | na                                                                           | 37.3242 | Len         |
| GSTM3                | GSTM3:glutathione S-transferase M3 (brain)                                   | 38.3242 | Len         |
| FPR1                 | FPR1:formyl peptide receptor 1                                               | 39.3242 | Len         |
| IL1R2                | IL1R2:interleukin 1 receptor, type II                                        | .3242   | Len         |

| Name                | Description                                                              | S2NR    | Upregulated |
|---------------------|--------------------------------------------------------------------------|---------|-------------|
| FLT3                | FLT3:fms-related tyrosine kinase 3                                       | 41.3242 | Len         |
| CD163               | CD163:CD163 molecule                                                     | 42.3242 | Len         |
| EREG                | EREG:epiregulin                                                          | 43.3242 | Len         |
| FKBP5               | FKBP5:FK506 binding protein 5                                            | 44.3242 | Len         |
| FPRL1               | FPRL1:formyl peptide receptor-like 1                                     | .3242   | Len         |
| TPST1               | TPST1:tyrosylprotein sulfotransferase 1                                  | 46.3242 | Len         |
| WFDC1               | WFDC1:WAP four-disulfide core domain 1                                   | 47.3242 | Len         |
| TMEM158             | TMEM158:transmembrane protein 158                                        | 48.3242 | Len         |
| UGCG                | UGCG:UDP-glucose ceramide glucosyltransferase                            | 49.3242 | Len         |
| SLC36A1             | SLC36A1:solute carrier family 36 (proton/amino acid symporter), member 1 | 50.3242 | Len         |
| TACSTD2             | TACSTD2:tumor-associated calcium signal transducer 2                     | 51.3242 | Len         |
| TPST2               | TPST2:tyrosylprotein sulfotransferase 2                                  | 52.3242 | Len         |
| DHRS9               | DHRS9:dehydrogenase/reductase (SDR family) member 9                      | 53.3242 | Len         |
| MYO1B               | MYO1B:myosin IB                                                          | 54.3242 | Len         |
| CPM                 | CPM:carboxypeptidase M                                                   | 55.3242 | Len         |
| BCL2L11             | BCL2L11:BCL2-like 11 (apoptosis facilitator)                             | 56.3242 | Len         |
| MT2A                | MT2A:metallothionein 2A                                                  | 57.3242 | Len         |
| DEFA1 /// DEFA3 /// | na                                                                       | 58.3242 | Dex+Len     |
| NNMT                | NNMT:nicotinamide N-methyltransferase                                    | 59.3242 | Dex+Len     |
| STARD13             | STARD13:START domain containing 13                                       | 60.3242 | Dex+Len     |
| STAT4               | STAT4:signal transducer and activator of transcription 4                 | 61.3242 | Dex+Len     |
| RNASE1              | RNASE1:ribonuclease, RNase A family, 1 (pancreatic)                      | 62.3242 | Dex+Len     |
| RHCE /// RHD        | na                                                                       | 63.3242 | Dex+Len     |
| RHCE                | RHCE:Rh blood group, CcEe antigens                                       | 64.3242 | Dex+Len     |
| TM4SF1              | TM4SF1:transmembrane 4 L six family member 1                             | 65.3242 | Dex+Len     |
| CHI3L1              | CHI3L1:chitinase 3-like 1 (cartilage glycoprotein-39)                    | 66.3242 | Dex+Len     |
| SPARC               | SPARC:secreted protein, acidic, cysteine-rich (osteonectin)              | 67.3242 | Dex+Len     |
| MYO5C               | MYO5C:myosin VC                                                          | 68.3242 | Dex+Len     |
| RAB13               | RAB13:RAB13, member RAS oncogene family                                  | 69.3242 | Dex+Len     |
| VSIG4               | VSIG4:V-set and immunoglobulin domain containing 4                       | 70.3242 | Dex+Len     |
| IFITM3              | IFITM3:interferon induced transmembrane protein 3 (1-8U)                 | 71.3242 | Dex+Len     |
| FCGRT               | FCGRT:Fc fragment of IgG, receptor, transporter, alpha                   | 72.3242 | Dex+Len     |
| TMEM45A             | TMEM45A:transmembrane protein 45A                                        | 73.3242 | Dex+Len     |
| RAB38               | RAB38:RAB38, member RAS oncogene family                                  | 74.3242 | Dex+Len     |
| ALDH7A1             | ALDH7A1:aldehyde dehydrogenase 7 family, member A1                       | 75.3242 | Dex+Len     |
| TOM1L1              | TOM1L1:target of myb1-like 1 (chicken)                                   | 76.3242 | Dex+Len     |
| DBNDD2              | DBNDD2:dysbindin (dystrobrevin binding protein 1) domain containing 2    | 77.3242 | Dex+Len     |
| SYNJ2               | SYNJ2:synaptojanin 2                                                     | 78.3242 | Dex+Len     |
| C5                  | C5:complement component 5                                                | 79.3242 | Dex+Len     |
| FSTL1               | FSTL1:folistatin-like 1                                                  | 80.3242 | Dex+Len     |
| ZNF692              | ZNF692:zinc finger protein 692                                           | 81.3242 | Dex+Len     |

| Name                 | Description                                                                                                                   | S2NR     | Upregulated |
|----------------------|-------------------------------------------------------------------------------------------------------------------------------|----------|-------------|
| CXCL1                | CXCL1:chemokine (C-X-C motif) ligand 1 (melanoma growth stimulating activity, alpha)                                          | 82.3242  | Dex+Len     |
| AASS                 | AASS:aminoadipate-semialdehyde synthase                                                                                       | 83.3242  | Dex+Len     |
| TPBG                 | TPBG:trophoblast glycoprotein                                                                                                 | 84.3242  | Dex+Len     |
| PPFIBP1              | PPFIBP1:PTPRF interacting protein, binding protein 1 (liprin beta 1)                                                          | 85.3242  | Dex+Len     |
| AKR1C1               | AKR1C1:aldo-keto reductase family 1, member C1 (dihydrodiol dehydrogenase 1; 20-alpha (3-alpha)-hydroxysteroid dehydrogenase) | 86.3242  | Dex+Len     |
| NR1H3                | NR1H3:nuclear receptor subfamily 1, group H, member 3                                                                         | 87.3242  | Dex+Len     |
| JAK2                 | JAK2:Janus kinase 2 (a protein tyrosine kinase)                                                                               | 88.3242  | Dex+Len     |
| CALB1                | CALB1:calbindin 1, 28kDa                                                                                                      | 89.3242  | Dex+Len     |
| KIAA1598             | KIAA1598:KIAA1598                                                                                                             | 90.3242  | Dex+Len     |
| TREM2                | TREM2:triggering receptor expressed on myeloid cells 2                                                                        | 91.3242  | Dex+Len     |
| AK1                  | AK1:adenylate kinase 1                                                                                                        | 92.3242  | Dex+Len     |
| SLC28A3              | SLC28A3:solute carrier family 28 (sodium-coupled nucleoside transporter), member 3                                            | 93.3242  | Dex+Len     |
| OLFML2B              | OLFML2B:olfactomedin-like 2B                                                                                                  | 94.3242  | Dex+Len     |
| ALOX12               | ALOX12:arachidonate 12-lipoxygenase                                                                                           | 95.3242  | Dex+Len     |
| GP1BA                | GP1BA:glycoprotein Ib (platelet), alpha polypeptide                                                                           | 96.3242  | Dex+Len     |
| SLAMF8               | SLAMF8:SLAM family member 8                                                                                                   | 97.3242  | Dex+Len     |
| ZNF228               | ZNF228:zinc finger protein 228                                                                                                | 98.3242  | Dex+Len     |
| AQP3                 | AQP3:aquaporin 3 (Gill blood group)                                                                                           | 99.3242  | Dex+Len     |
| OAS3                 | OAS3:2'-5'-oligoadenylate synthetase 3, 100kDa                                                                                | 100.3242 | Dex+Len     |
| SLC38A6              | SLC38A6:solute carrier family 38, member 6                                                                                    | 101.3242 | Dex+Len     |
| IL7R                 | IL7R:interleukin 7 receptor                                                                                                   | 102.3242 | Dex+Len     |
| LGALS3BP             | LGALS3BP:lectin, galactoside-binding, soluble, 3 binding protein                                                              | 103.3242 | Dex+Len     |
| SERPING1             | SERPING1:serpin peptidase inhibitor, clade G (C1 inhibitor), member 1, (angioedema, hereditary)                               | 104.3242 | Dex+Len     |
| OCLN /// LOC647859 / | na                                                                                                                            | 105.3242 | Dex+Len     |
| PLS3                 | PLS3:plastin 3 (T isoform)                                                                                                    | 106.3242 | Dex+Len     |
| SPP1                 | SPP1:secreted phosphoprotein 1 (osteopontin, bone sialoprotein I, early T-lymphocyte activation 1)                            | 107.3242 | Dex+Len     |

**Figure S1. Dexamethasone increases the size of BFU-E colony formation**

Following 3 days of treatment with compounds in liquid culture, cells were plated in methylcellulose without drugs. The effects of vehicle control (DMSO) on BFU-E colony size are shown in the top 3 panels while the effects of 1  $\mu$ M of dexamethasone (Dex) are shown in the bottom 3 panels. Pictures were taken at the same magnification and with no manipulation of the images.

**Figure S2. Erythropoietin causes a dose dependent increase in both CFU-E and BFU-E colony formation**

Following three days of treatment with erythropoietin (EPO) in liquid culture, cells were plated in methylcellulose without EPO. Data are presented as the number of colonies per 3200 cells plated. The experiment was performed in triplicate. A two-tailed Student's t-test was used and \*\* indicates  $p \leq 0.01$  and \* indicates  $p \leq 0.05$ .

**Figure S3. Dexamethasone increases BFU-E colony formation while lenalidomide increases CFU-E colony formation over a range of treatment durations**

Following one-five days of treatment with compounds in liquid culture, cells were plated in methylcellulose without drugs. Data are presented as the number of colonies per 3200 cells plated. The effects of dexamethasone (Dex) on CFU-E colony formation are shown in (A) and on BFU-E colony formation in (B). The effects of lenalidomide (Len) on CFU-E colony formation are shown in (C) and on BFU-E colony formation in (D). The experiments were performed in triplicate. A two tailed Student's t-test was used and \*\* indicates  $p \leq 0.01$  and \* indicates  $p \leq 0.05$ .

**Figure S4. Dexamethasone and lenalidomide promote the production of erythroid cells**

The absolute number of erythroid cells following 10 days of liquid culture was determined by multiplying the number of cells counted/well by the percentage of those cells which express any erythroid markers (CD71, glycophorin A), assayed by flow cytometry. Data is presented as relative number. The experiments were performed in triplicate and repeated with similar results. A two tailed Student's t-test was used and \*\* indicates  $p \leq 0.01$  and \* indicates  $p \leq 0.05$ .

**Figure S5. Dexamethasone and lenalidomide increase the production of erythroid cells from CD34<sup>+</sup> cells expressing RPS14 or RPS19 shRNAs without increasing apoptosis**

In (A) and (D), a Western blot shows the decreased level of protein with RPS19 knockdown (83.7% knockdown by RT-qPCR) and with RPS14 knockdown (72.5% knockdown by RT-qPCR). The absolute number of erythroid cells following 10 days of liquid culture was determined by multiplying the number of cells counted per well by the percentage of those cells which express any erythroid markers (CD71, glycophorin A), assayed by flow cytometry. Data is presented as relative number to eliminate differences caused by cell number and infection rate. The effects of dexamethasone (Dex), lenalidomide (Len), and control on cells infected with a RPS19 shRNA are shown in (B). The effects of dexamethasone (Dex), lenalidomide (Len), and control on cells infected with a RPS14 shRNA are shown in (E). No increase in annexin staining noted in CD34<sup>+</sup> cells expressing RPS19 or RPS14 shRNAs and treated with either dexamethasone or lenalidomide when compared to vehicle control as shown in (C) and (F). The experiments were performed in triplicate and the entire experiment was repeated with similar results with an independent shRNA (Fig. 2). A two tailed Student's t-test was used and \*\* indicates  $p \leq 0.01$  and \* indicates  $p \leq 0.05$ .

**Figure S6. The combination of dexamethasone and lenalidomide has an additive effect on increasing the production of erythroid cells from CD34<sup>+</sup> cells expressing RPS14 or RPS19 shRNAs**

The effects of combination treatment with dexamethasone (Dex) and lenalidomide (Len) and control on cells infected with a *RPS19* shRNA are shown in (A) and with a *RPS14* shRNA in (B). The absolute number of erythroid cells following 10 days of liquid culture was determined by multiplying the number of cells counted per well by the percentage of those cells which express any erythroid markers (CD71, glycophorin A), assayed by flow cytometry. Data is presented as relative number to eliminate differences caused by cell number and infection rate. The expected number of erythroid cells was calculated as follows: Expected # of Cells = (Absolute # erythroid cells with Dex treatment alone -Control) + (Absolute # erythroid cells with Len treatment alone -Control) + Control. The experiments were performed in triplicate and the entire experiment was repeated with similar results with an independent shRNA (Fig. 3). ANOVA was used and the stastical findings are discussed in the text.

**Figure S7. Dexamethasone and lenalidomide, alone or in combination, do not affect the expression of ribosomal genes**

Gene Set Enrichment Analysis was performed using a set of 85 ribosomal genes. No change in ribosomal gene expression occurs with any of the drug treatments relative to control.

DMSO

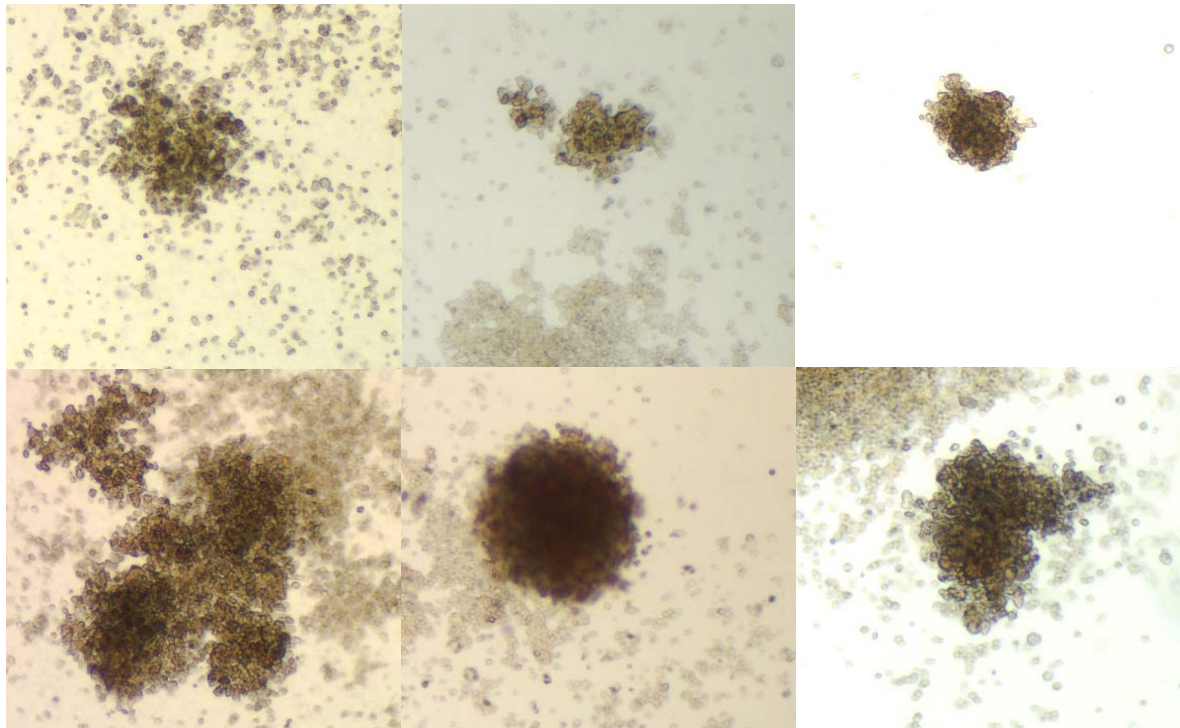

Dex

**Figure S1**

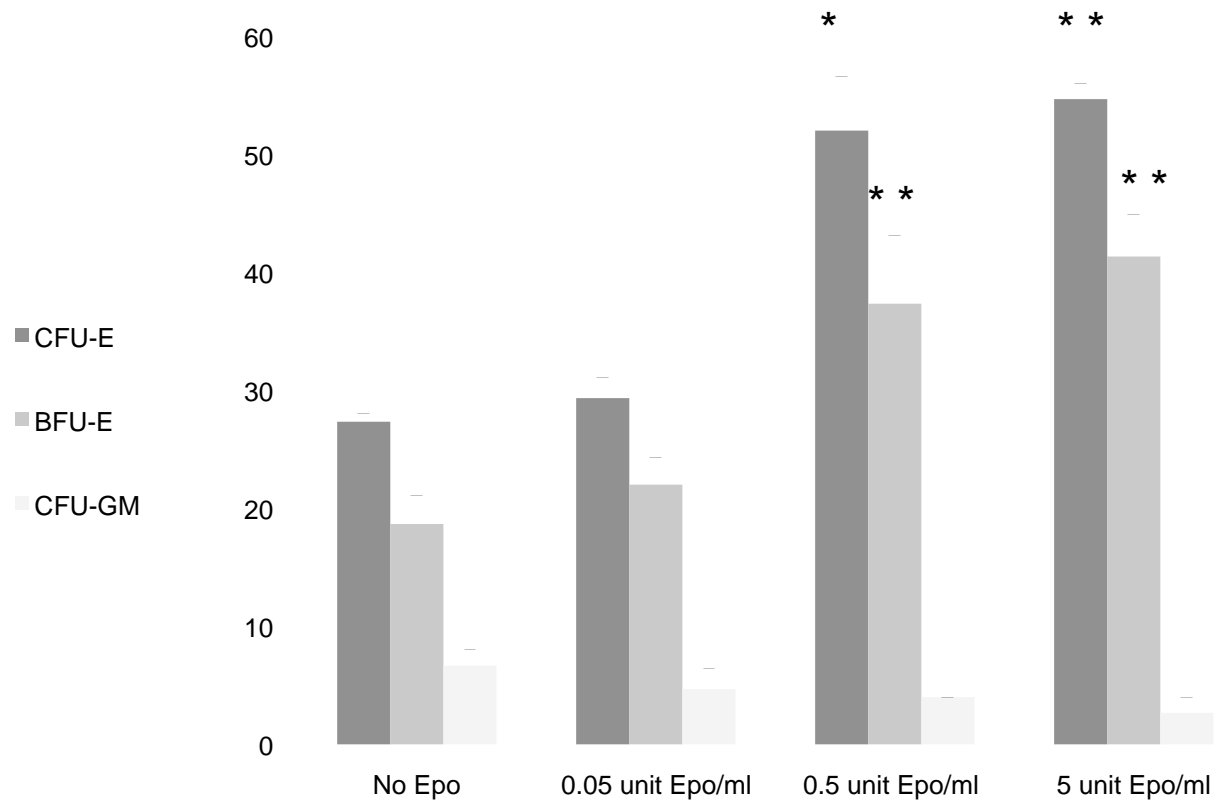

**Figure S2**



□

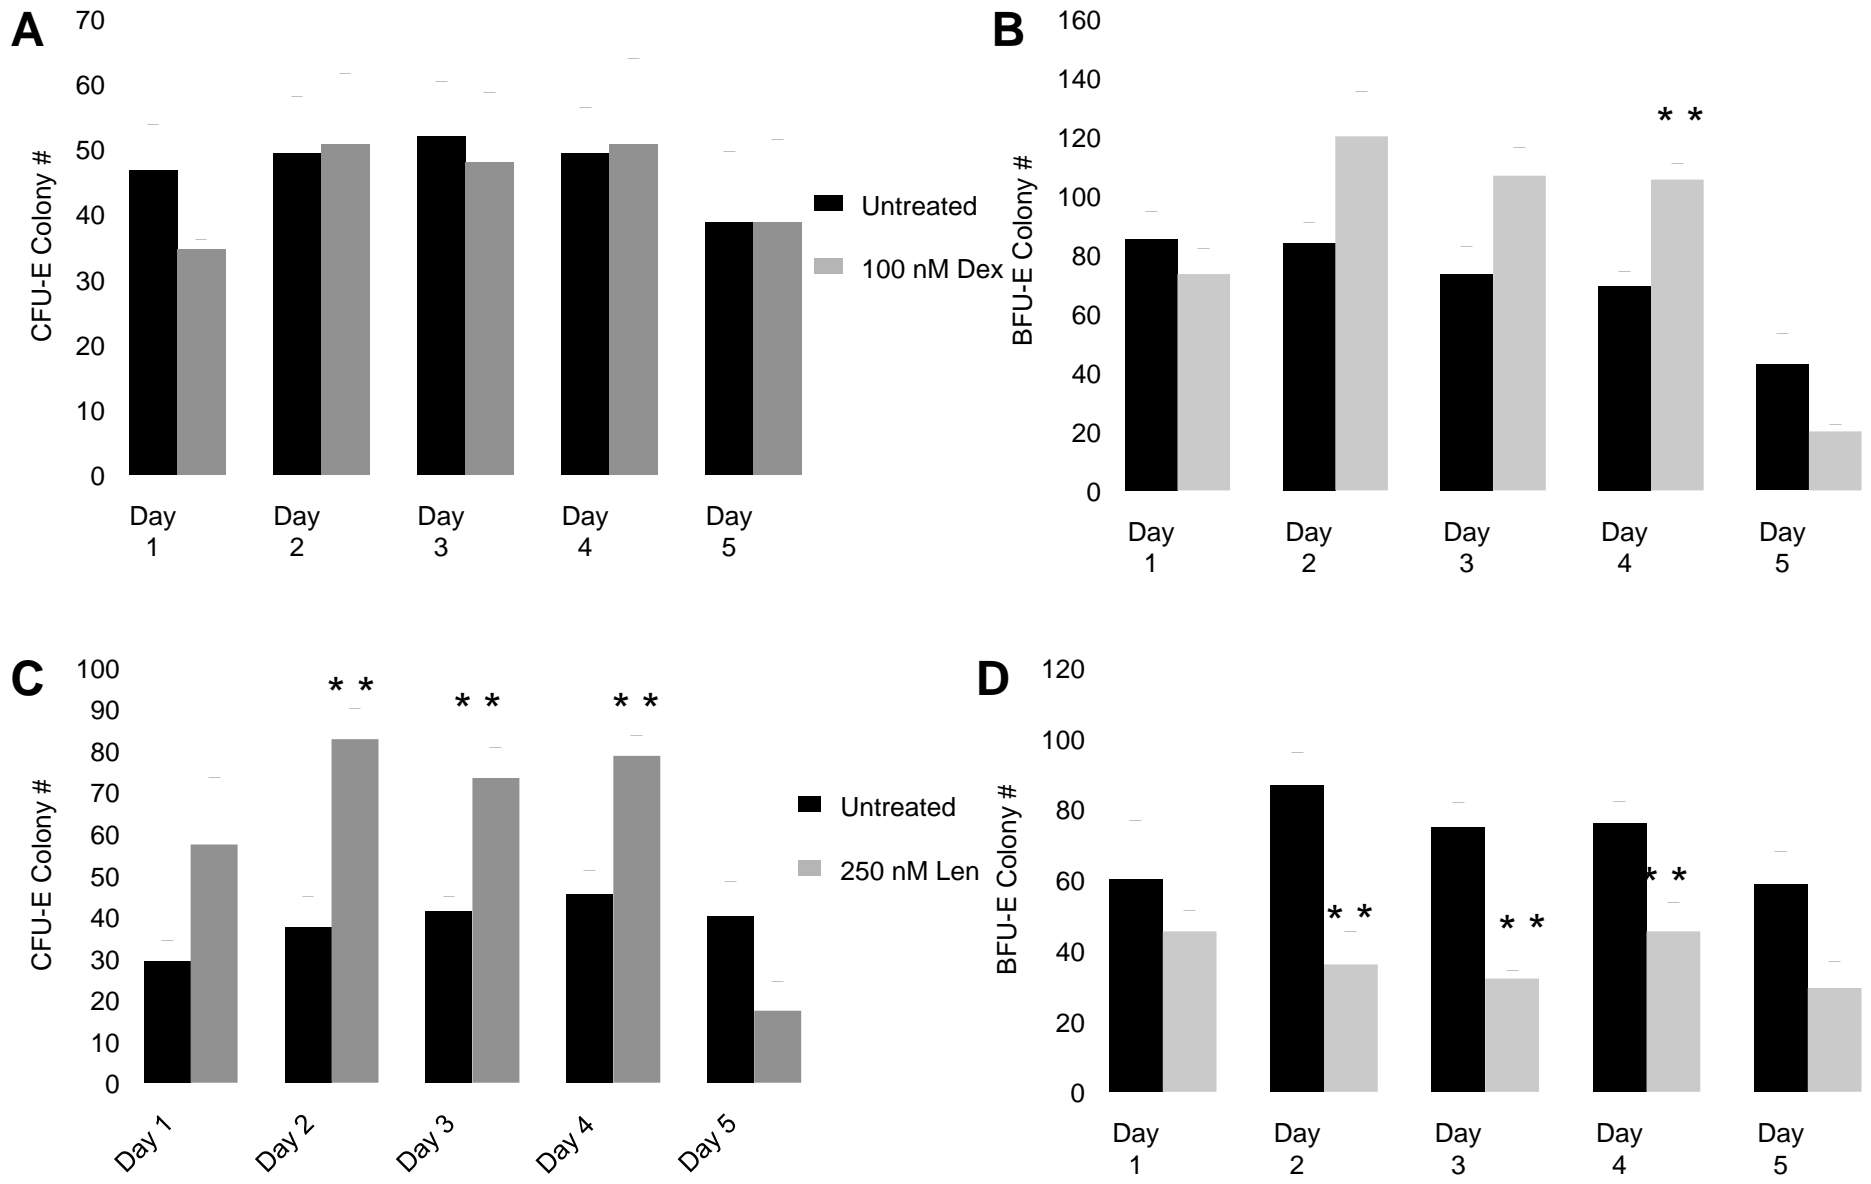

**Figure S3**

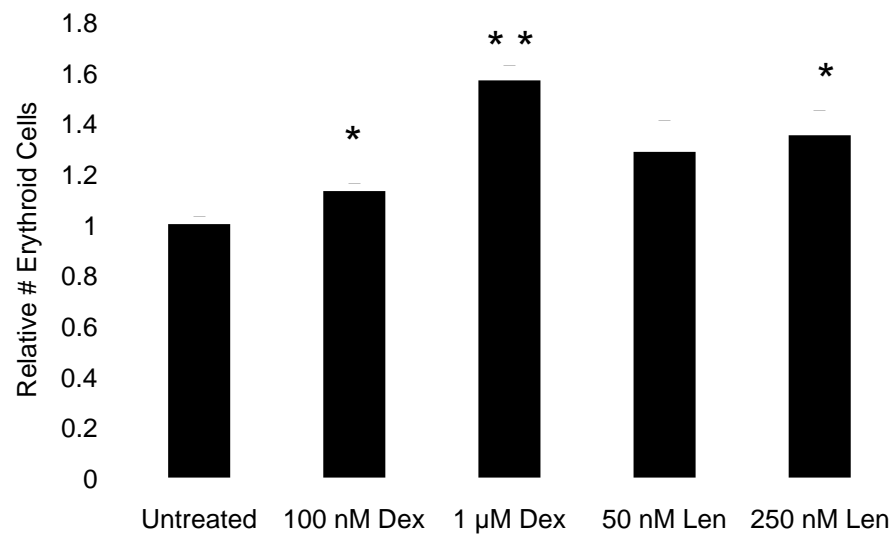

**Figure S4**

**SUPPLEMENTAL  
FIGURE 5: A-F**

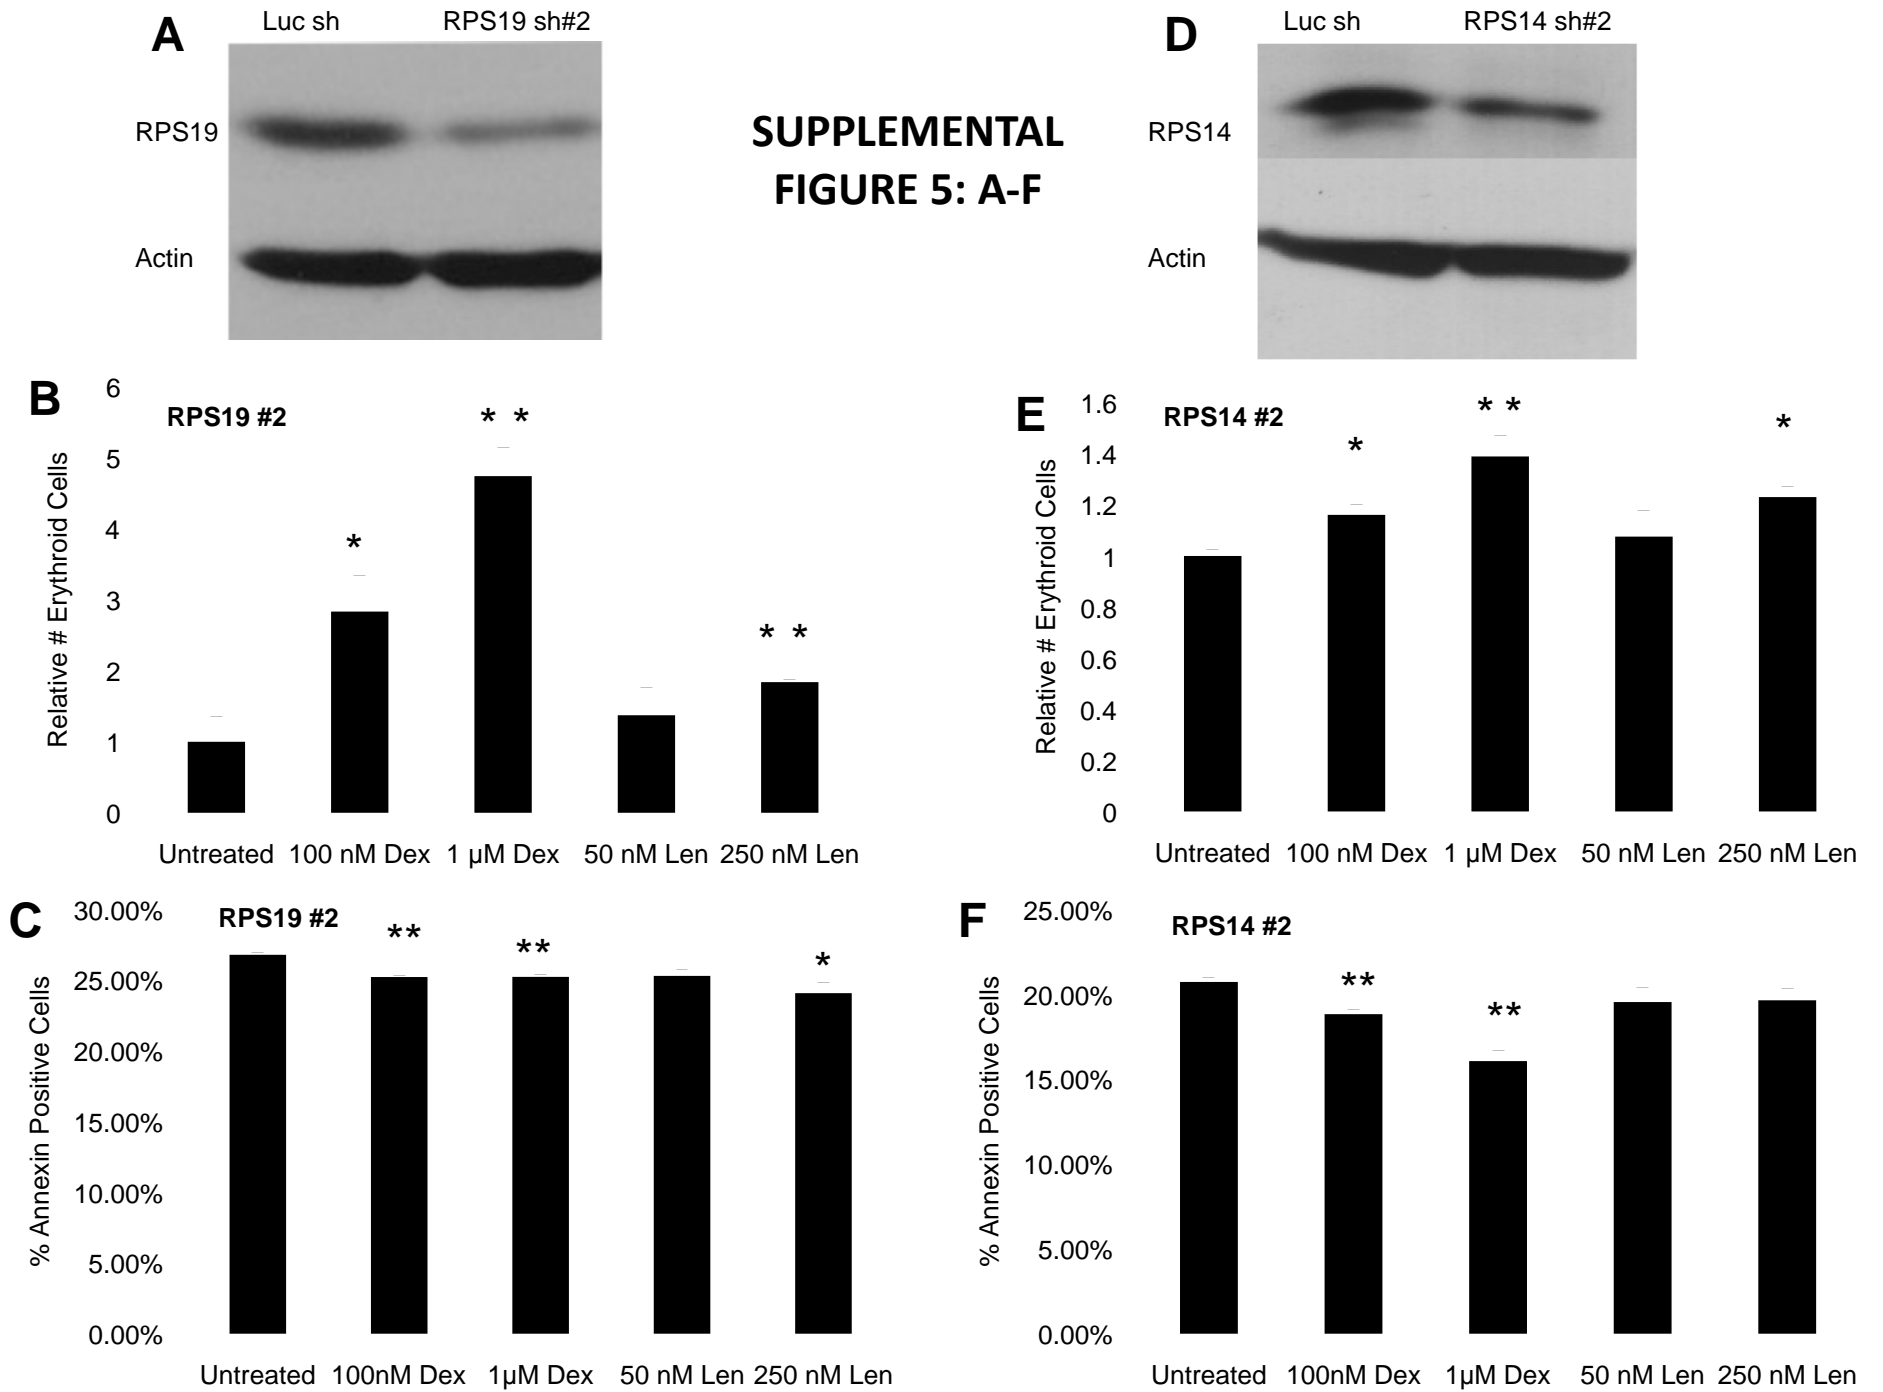

Figure S5

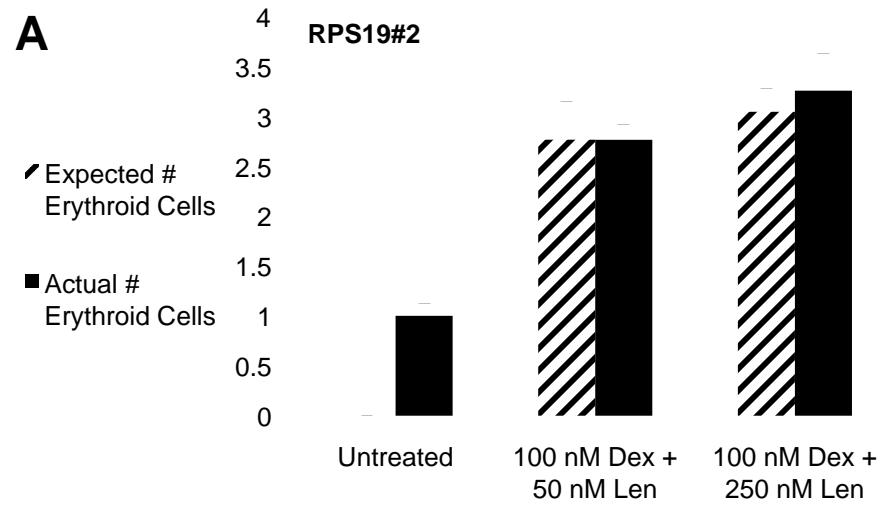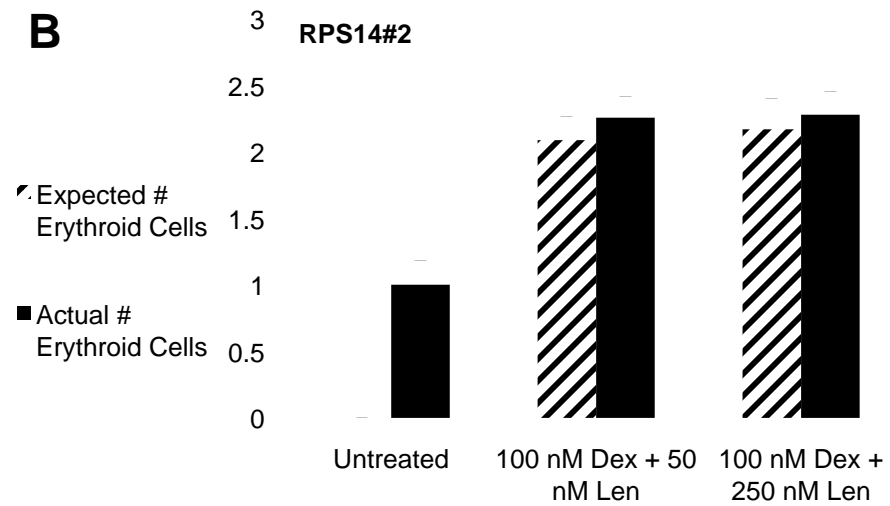

**Figure S6**

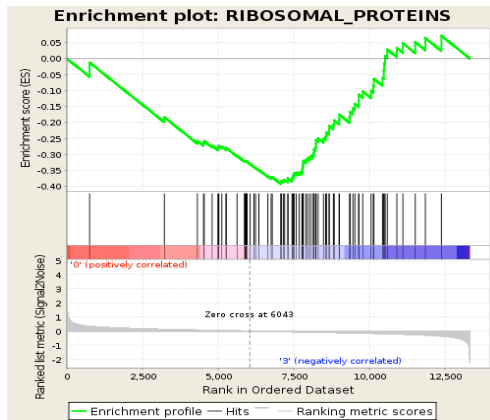

Dex vs. Untreated  
Not significant

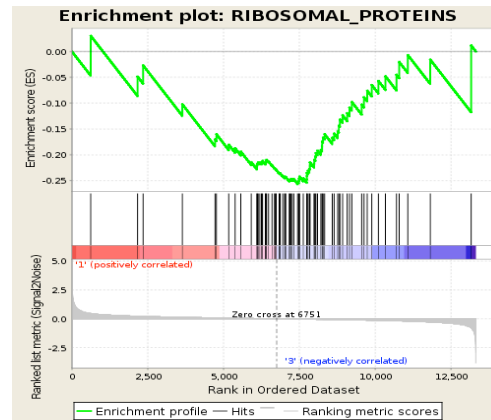

Len vs. Untreated  
Not significant

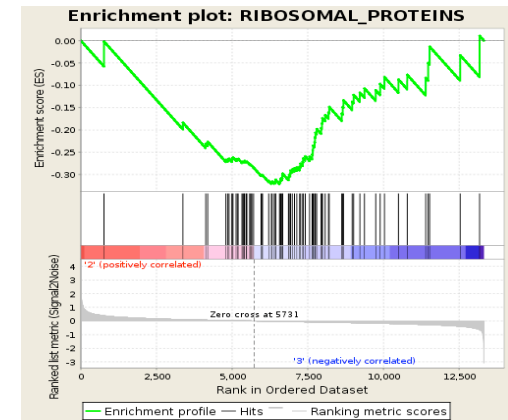

Dex+Len vs. Untreated  
Not significant

**Figure S7**
